# Supplementary material
Source: PubMed Central journal article supplement (PMC5079245)
Supplement: PRO-25-2006-s002.pdf [file PRO-25-2006-s002.pdf]

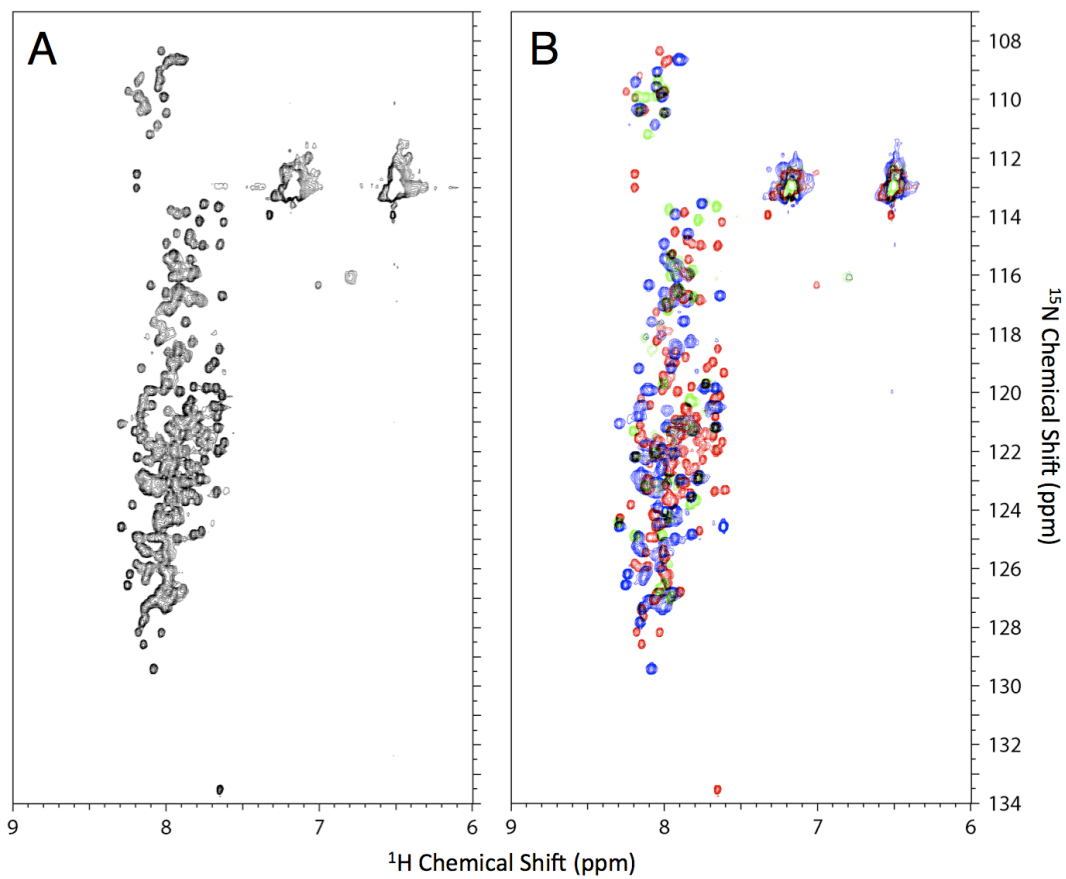

**Figure S2**

(A)  $^1\text{H}$ - $^{15}\text{N}$  HSQC spectra of  $^{15}\text{N}$ -TAF4(270-700) recorded at  $4^\circ\text{C}$ . (B) Overlay of the  $^1\text{H}$ - $^{15}\text{N}$  HSQC spectra of  $^{15}\text{N}$ -Q1Q2 (red),  $^{15}\text{N}$ -CI (green), and  $^{15}\text{N}$ -Q3Q4 (blue) recorded separately at  $4^\circ\text{C}$ .
