# Supplementary material
Source: PubMed Central journal article supplement (PMC5079245)
Supplement: PRO-25-2006-s003.pdf [file PRO-25-2006-s003.pdf]

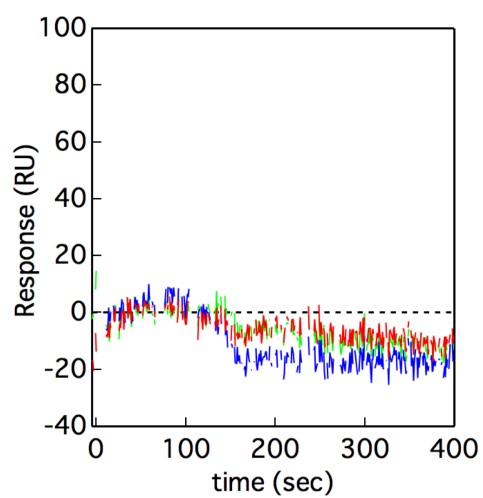

### Figure S3

The interaction between Sp1-QA and TAF4N/C measured by the SPR. Sp1-QA was immobilized on an HTG chip via the hexahistidine-tag at the C-terminus. The lines represent the sensorgrams recorded after loading TAF4N/C for 150 s at a concentration of 2 (red), 1.2 (green) and 0.4  $\mu\text{M}$  (blue), respectively, followed by the flow of its absence for 300 s.
