# Supplementary material
Source: PubMed Central journal article supplement (PMC5079245)

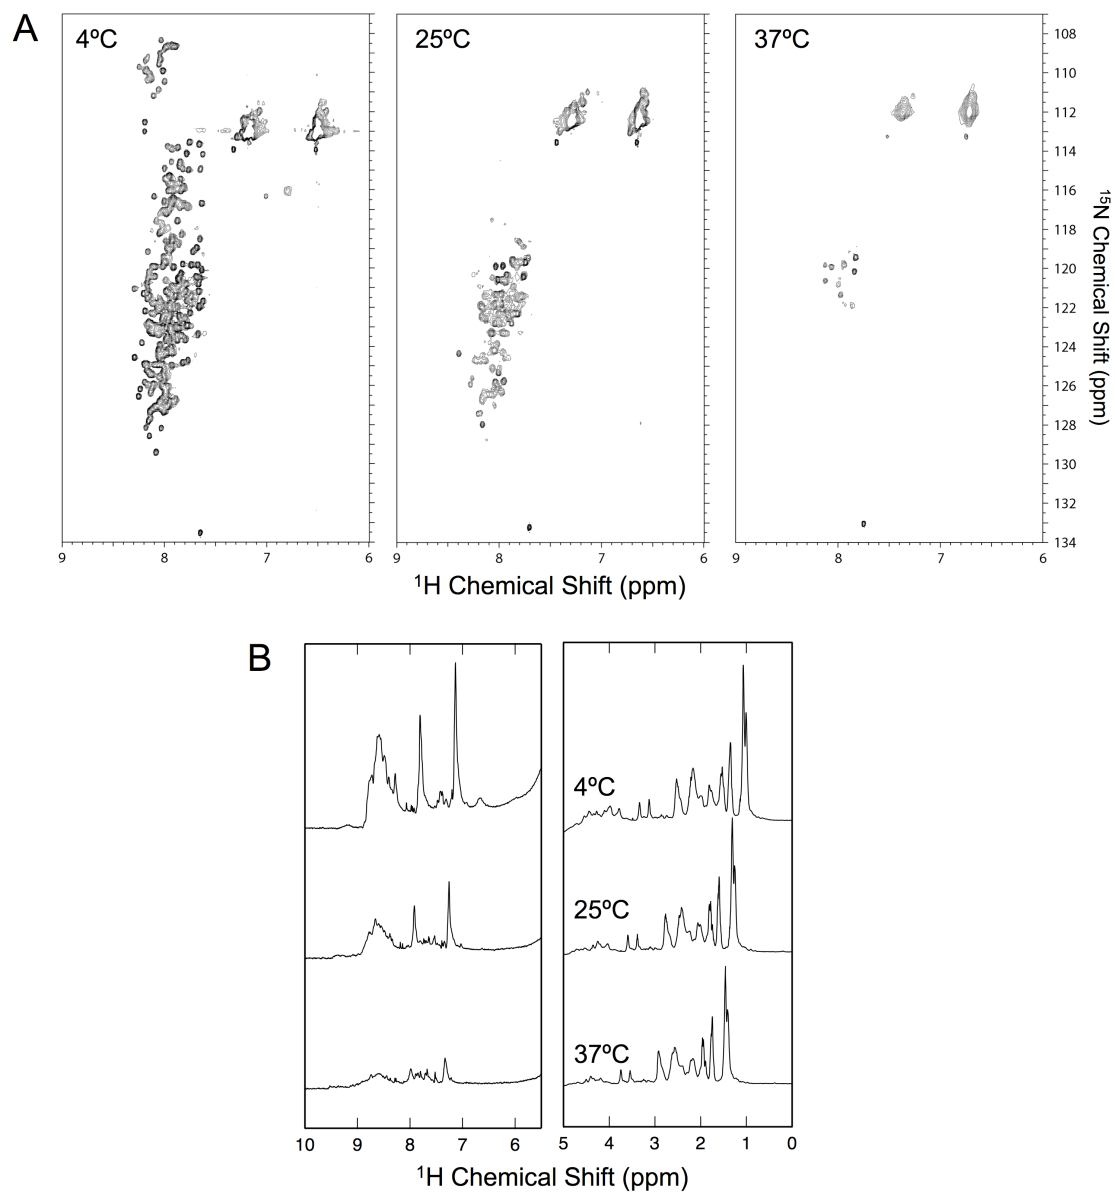

**Figure S1**

$^1\text{H}$ - $^{15}\text{N}$  HSQC (A) and one-dimensional  $^1\text{H}$  (B) spectra of  $^{15}\text{N}$ -TAF4(270-700) recorded at 4°C, 25°C and 37°C.

Supplement: PRO-25-2006-s001.pdf [file PRO-25-2006-s001.pdf]
